# Supplementary material for: Genetic tools for the redirection of the central carbon flow towards the production of lactate in the human gut bacterium Phocaeicola (Bacteroides) vulgatus
Source: PubMed Central journal article supplement (PMC8816746; doi:10.1007/s00253-022-11777-6), 2022-01-26
Supplement: 253_2022_11777_MOESM1_ESM.pdf [file 253_2022_11777_MOESM1_ESM.pdf]

Supplementary Material for:

Applied Microbiology & Biotechnology

**Genetic tools for the redirection of the central carbon flow towards the production of lactate in the human gut bacterium *Phocaeicola (Bacteroides) vulgatus***

**Rebecca Lück and Uwe Deppenmeier\***

Institute of Microbiology and Biotechnology, University of Bonn, Meckenheimer Allee 168,  
53115 Bonn, Germany

\*For correspondence. E-mail: [udeppen@uni-bonn.de](mailto:udeppen@uni-bonn.de); Tel. +49-228-735590; Fax +49-228-737576.

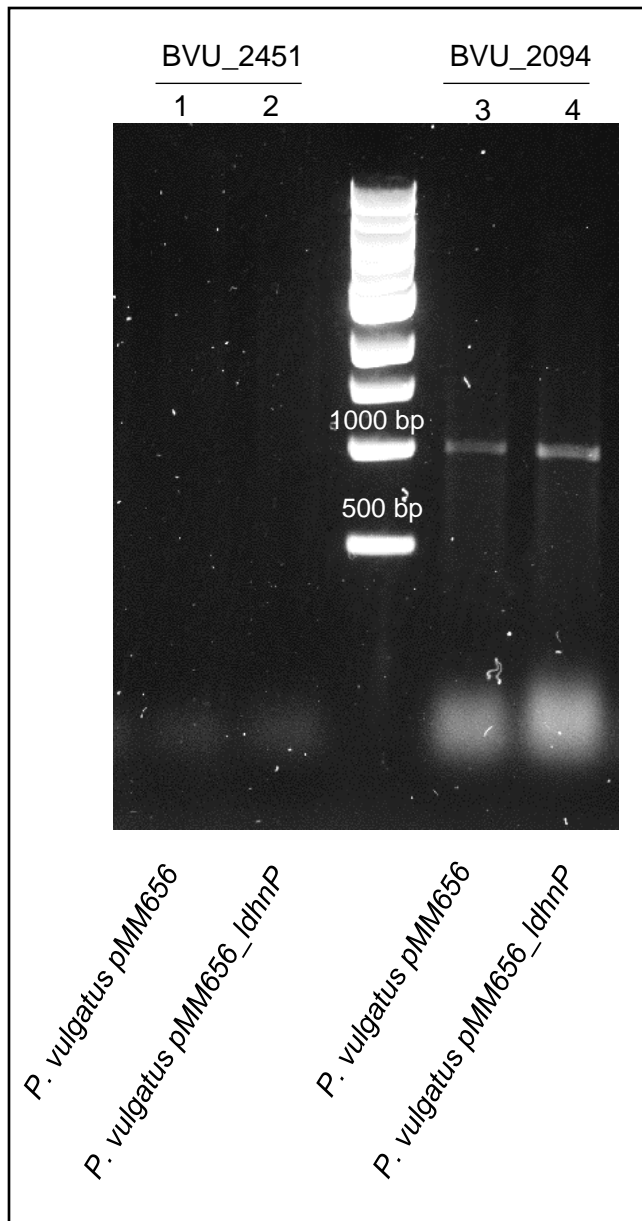

**Fig. S1** PCR verification of the genomic integration of pMM656 and pMM656\_ *ldhnP* into the gene BVU\_2094 of *P. vulgatus*. Vector integration can occur between the attN2 site of pMM656 and one of two attPV sites at the 3' ends of the two tRNA<sup>Ser</sup> genes, BVU\_2451 and BVU\_2094, on the *P. vulgatus* chromosome. Primer attB\_inErm\_rev and attB2451\_for or attB2094\_for were used to detect integration, with attB\_inErm\_rev binding in the plasmid backbone of pMM656 and attB2451\_for/attB2094\_for binding in the genome upstream of the corresponding attPV site. Primer pair attB\_inErm\_rev and attB2094\_for demonstrated the integration of attN2 from pMM656 (line 3) and pMM656\_ *ldhnP* (line 4) into chromosomal gene BVU\_2094. Integration of the attN2 site into the corresponding locus resulted in a PCR fragment size of 1021 bp. An integration of the plasmids into the attPV site located in BVU\_2451 did not occur, since the addition of primers attB\_inErm\_rev and attB2451\_for did not lead to a DNA fragment in the PCR assay (line 1 and 2).

|       |                                                         |                                       |                             |     |
|-------|---------------------------------------------------------|---------------------------------------|-----------------------------|-----|
| PvLDH | MAYKIAFYDTPKYDERSFTEANEKFG-FDIRYYKGHLNMNNVVLTKGVDVVICI  | <b>FV</b> NDTAD                       | 59                          |     |
| EcLDH | --MKLAVYSTKQYDKKYLQQVNESFG-FELEFFDFLLTEKTAKTANGCEAVCI   | <b>FV</b> NDDGS                       | 57                          |     |
| PaLDH | --MRILFFSSQAYDSESFQASNHRHG-FELHFQQAHLQADTAVLAQGFVVCA    | <b>FV</b> NDDLS                       | 57                          |     |
| LcLDH | --MKIIAYGARVDEIQYFKQWAKDTG-NTLEYHTEFLDENTVEWAKGFDGINS   | LQTT                                  | 57                          |     |
| LpLDH | --MKIIAYAVRDDRPFDFDTWMKENPDVEVKLVPELLTEDNVDLAKGFDGADV   | <b>YQ</b> QKDYT                       | 58                          |     |
| LdLDH | -MTKIFAYAIREDKPFLEKWEWDAHKDVEVEYTDKLLTPETVALAKGADGVVV   | <b>YQ</b> QLDYT                       | 59                          |     |
|       | : : : : : . . * . . . : * :                             |                                       |                             |     |
| PvLDH | AEVIRAMADNGVKLLALRC                                     | <b>AG</b> YNNVDLAAT-AGKMKV            | <b>RV</b> PAYS              | 118 |
| EcLDH | RPVLEELKKHGKVI                                          | IALRCA <b>GF</b> NNVDLDAAKELGLKV      | <b>RV</b> PAYD              | 117 |
| PaLDH | RPVLERLAAGGTRLVALRS                                     | <b>AG</b> YNHVDLAAAEALGLPV            | <b>HV</b> PAYS              | 117 |
| LcLDH | AGVFEKMHAYGIKFLTIRN                                     | <b>VG</b> TDNIDMTAMKQYGIRLS           | <b>NV</b> PAYS              | 117 |
| LpLDH | AEVLNKLADGKVNISLRN                                      | <b>VG</b> VDNLDVPTVKARGLNIS           | <b>NV</b> PAYS              | 118 |
| LdLDH | AETLQALADNGITKMSLRN                                     | <b>VG</b> VDNIDMAKAKELGFQIT           | <b>NV</b> PVYS              | 119 |
|       | . . . : * : : * . * : : * : : : . * . * . * * : * * : : |                                       |                             |     |
| PvLDH | RKI PRATMRTRDGNFSL-HGLMGDFMHGKTAGI                      | I <b>GTGKIA</b> KILIQILRGFGMNVLAY     | <b>DLY</b>                  | 177 |
| EcLDH | RRIHRA YQRTRDANFSL-EGLTGFTMYGKTAGVI                     | <b>GTGKIG</b> VAMLRILKGFGRMLLAF       | <b>DPY</b>                  | 176 |
| PaLDH | RRLHRA YNRTREGDFSL-HGLTGFDLHGKRVGVI                     | <b>GTGQIG</b> ETFARIMAGFGCELLAY       | <b>DPY</b>                  | 176 |
| LcLDH | RNMKGVAQQLQAGDYEKAGTFIGKELGQQT                          | VGVM <b>GTGHIG</b> QVAIKLFGFGAKVIA    | <b>DPY</b>                  | 177 |
| LpLDH | RQTPMFNKKLAKQDFRW-APDI AKELNMTVGVI                      | <b>GTGRIG</b> RAAIDIFKGF GAKVIGY      | <b>DVY</b>                  | 177 |
| LdLDH | RQDKAMDEKVARHDLRW-APTIGREVRDQV                          | GV <b>GTGHIG</b> QVFMQIMEGFGAKVIA     | <b>YDIF</b>                 | 178 |
|       | * . : : : . : . * : : * * * . * : : * * * . . . . : * : |                                       |                             |     |
| PvLDH | PDYNFAREHQVYVYCTLDELYHSSDIISLHCP                        | LTEQTKYLINDYSISKMKDGVMII              | <b>NTGRG</b>                | 237 |
| EcLDH | PSAAA-LELGV EYVDLPTLFSESDVISLHCP                        | LTPENYHLLNEAAFEQMKNGVMIV              | <b>NTSRG</b>                | 235 |
| PaLDH | PNPRI-QALGGRYLALDALLAESDVISLHCP                         | LADTRHLIDAQRLATMKPGAMLIN              | <b>NTGRG</b>                | 235 |
| LcLDH | PMKGD-HP-DFDYV SLEDLDFKQSDVIDLHVP                       | PIEQNTHINEAAFNLMPGAIVIN               | <b>TARP</b>                 | 235 |
| LpLDH | RNAEL-EKEGMYVDTLDELYAQADVI                              | TLHVPALKDNYHMLNADAFSKMKD              | GAYILN <b>FARG</b>          | 236 |
| LdLDH | RNPEL-EKKGYVDSLDDLYKQADVISLHVP                          | DVPANVHMINDESI AKMKQDVVIV             | <b>NSRG</b>                 | 237 |
|       | * * . : : * * * . . : : : : * * . . : : * . *           |                                       |                             |     |
| PvLDH | QLIHTNALIEGLKTKKVG YAGLDVYEE                            | <b>EE</b> EPYFYEDKSDKIIDDDTLARLLS     | FNNVIV <b>TSH</b>           | 297 |
| EcLDH | ALIDSQA AIEALKNQKIGSLGMDVYEN                            | <b>ER</b> DLFFEDKSNVDIQDDVFRRLS       | ACHNVLF <b>TGH</b>          | 295 |
| PaLDH | ALVNAAAALIEALKSGQLG YLGLDVYEE                           | <b>EAD</b> IFFEDRS DQPLQDDVLRLLS      | FPNVV <b>TAH</b>            | 295 |
| LcLDH | NLIDTQAMLSNLKSGKLAGV GIDTYEY                            | <b>ET</b> EDLLNLAKHGSFKDPLWDEL        | LGMNVV <b>LPH</b>           | 295 |
| LpLDH | TLIDSEDLIKALDSGKVAGAA                                   | <b>LV</b> TYEY <b>ET</b> KIFNKDLEGQTI | DDKVFMMNLFNRDNV <b>LTPH</b> | 296 |
| LdLDH | PLVDTDVAIRGLDSGKIFGYAM                                  | <b>DV</b> YEG <b>EV</b> GFINEDWEGKEFP | DARLADLIARPNV <b>LTPH</b>   | 297 |
|       | * : : : : * . . : : . : . * * * : : . : * * * * : : *   |                                       |                             |     |
| PvLDH | <b>QAF</b> FTKEAMTNIAHTTLQNVKDFAESRSLVNEVAVGRV          | 335                                   |                             |     |
| EcLDH | <b>QAF</b> LTAEALTSISQTTLQNLNLEKGETCPNELV----           | 329                                   |                             |     |
| PaLDH | <b>QAF</b> LREALAAIADTTLDNIAAWQDGTFRNRVRA----           | 329                                   |                             |     |
| LcLDH | IAYTETAVHNMVYFSLQHLVDFLTKGETSTEVTGPAK                   | 333                                   |                             |     |
| LpLDH | <b>TA</b> FYTETAVHNMVHVMNSNKQFIETGKADTQVKFD--           | 332                                   |                             |     |
| LdLDH | <b>TA</b> FYTTHAVRNMVVKAFDNNLELVEGKEAETPVKVG--          | 333                                   |                             |     |
|       | * : * * : : : :                                         |                                       |                             |     |

**Fig. S2** Sequence alignment of representative D-LDHs. The amino acid sequences of the D-LDHs from *P. vulgatus* (PvLDH; A6L392), *P. aeruginosa* (PaLDH; Q9I530), *E. coli* (EcLDH; P52643), *L. delbrueckii*, (LdLDH; P26297) and *L. pentosus* (LpLDH; P26298) as well as the D-hydroxyisocaproate dehydrogenase from *Lactobacillus casei* (LcHDH; A0A0E2BVW2) were aligned using the program Clustal Omega (<https://www.ebi.ac.uk/Tools/msa/clustalo/>). The characteristic motifs for D-LDHs are marked according to Furukawa et al. (2018): Amino acids of the substrate-binding site are shown in red and the residues involved in the coenzyme binding are colored in blue. The two hinge regions between the catalytic and the NAD-binding domains are boxed.

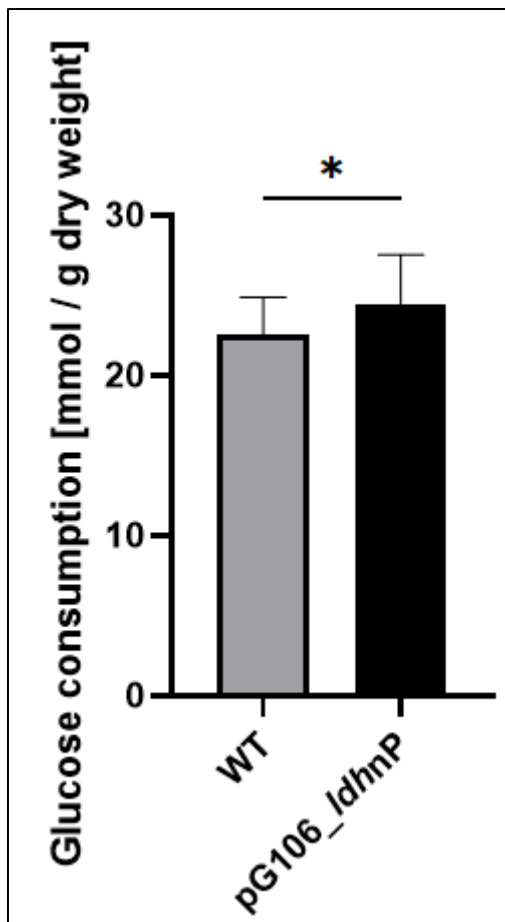

**Fig. S3** Substrate consumption. *P. vulgatus* WT (gray) and *P. vulgatus* pG106\_IdhnP (black) were grown in minimal medium with glucose as substrate. Cultures were harvested and the supernatants analyzed by HPLC. The amount of glucose consumption was correlated to the dry weight of the corresponding cultures. Values represent the average of at least 16 different cultures for each strain. For significance analysis data sets were analyzed by t-test using GraphPad Prism 8.0.2.263. \* =  $p \leq 0.05$ .
